# Supplementary material
Source: publisher site journal article supplement (https://www.dovepress.com/article/492153)
Supplement: Supplementary file 1 [file get_supplementary_file.php]

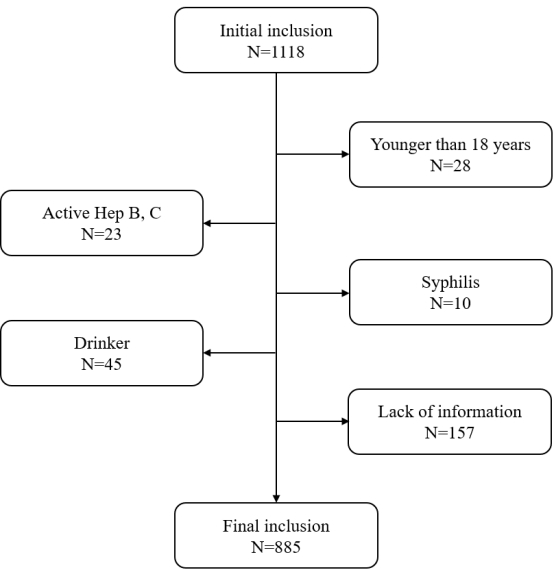
S

Supplementary Fig 1. Flowchart of participant exclusion in cohort of MAFLD patients referred for specialist assessment by primary care physicians


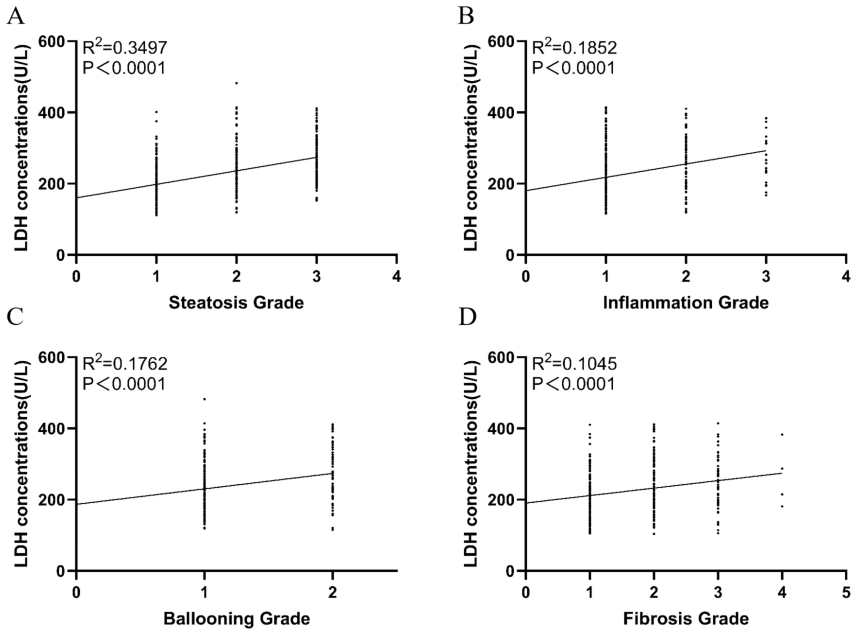


Supplementary Fig 2. Comparisons relevance of steatosis, inflammation, ballooning, fibrosis and serum LDH levels. LDH was positively associated with the severity of steatosis (R2 = 0.3497, P<.0001) (A), inflammation (R2 = 0.1852, P<.0001) (B), ballooning (R2 = 0.1762, P<.0001) (C), and fibrosis (R2 = 0.1045, P<.0001) (D)
